# Supplementary material
Source: MDPI journal article supplement (https://www.mdpi.com/2079-6412/11/3/352)
Supplement: s1 [file s1]

# Graphene Matrices as Carriers for Metal Ions Against Antibiotic Susceptible and Resistant Bacterial Pathogens

Anthony J. Slate <sup>1,2</sup>, Nathalie Karaky <sup>2</sup>, Grace S. Crowther <sup>3</sup>, Jonathan A. Butler <sup>3</sup>, Craig E. Banks <sup>3</sup>, Andrew J. McBain <sup>4</sup> and Kathryn A. Whitehead <sup>2,\*</sup>

<sup>1</sup> Department of Biology and Biochemistry, University of Bath, Claverton Down, Bath BA2 7AY, UK; ajs319@bath.ac.uk

<sup>2</sup> Microbiology at Interfaces, Manchester Metropolitan University, Chester Street, Manchester M1 5GD, UK; NATHALIE.KARAKY@stu.mmu.ac.uk

<sup>3</sup> Faculty of Science and Engineering, Manchester Metropolitan University, Chester Street, Manchester M1 5GD, UK; gracescrowther@gmail.com (G.S.C.); Jonathan.Butler@mmu.ac.uk (J.A.B.); c.banks@mmu.ac.uk (G.E.B.)

<sup>4</sup> Division of Pharmacy and Optometry, Faculty of Biology, Medicine and Health, School of Health Sciences, The University of Manchester, Manchester M13 9PL, UK; andrew.mc Bain@manchester.ac.uk

\* Correspondence: k.a.whitehead@mmu.ac.uk; Tel.: +44-(0)161-247-1157

**Table S1.** Clinical Breakpoints determined by disc diffusion assays, data obtained via The European Committee on Antimicrobial Susceptibility Testing (EUCAST) valid from 1<sup>st</sup> January 2021 [33]. Antibiotics not classified by EUCAST have been omitted from this table. Abbreviations: ND; not determined.

| Antibiotic                | EUCAST Clinical Breakpoints – Zone Diameter (mm) |              |                            |              |                         |              |                                                       |              |
|---------------------------|--------------------------------------------------|--------------|----------------------------|--------------|-------------------------|--------------|-------------------------------------------------------|--------------|
|                           | <i>Acinetobacter</i> spp.                        |              | <i>Staphylococcus</i> spp. |              | <i>Pseudomonas</i> spp. |              | <i>Klebsiella</i> spp.<br>( <i>Enterobacterales</i> ) |              |
|                           | Susceptible ≥                                    | Resistance > | Susceptible ≥              | Resistance > | Susceptible ≥           | Resistance > | Susceptible ≥                                         | Resistance > |
| Chloramphenicol (30 µg)   | ND                                               | ND           | 18                         | 18           | ND                      | ND           | 17                                                    | 17           |
| Erythromycin (15 µg)      | ND                                               | ND           | 21                         | 18           | ND                      | ND           | ND                                                    | ND           |
| Fusidic Acid (200 µg)     | ND                                               | ND           | 24                         | 24           | ND                      | ND           | ND                                                    | ND           |
| Oxacillin (30 µg)         | ND                                               | ND           | ND                         | ND           | ND                      | ND           | ND                                                    | ND           |
| Penicillin G (1 unit)     | ND                                               | ND           | 26                         | 26           | ND                      | ND           | ND                                                    | ND           |
| Tetracycline (20 µg)      | ND                                               | ND           | 22                         | 19           | ND                      | ND           | ND                                                    | ND           |
| Colistin Sulphate (30 µg) | ND                                               | ND           | ND                         | ND           | ND                      | ND           | ND                                                    | ND           |
| Nalidixic Acid (5 µg)     | ND                                               | ND           | ND                         | ND           | ND                      | ND           | ND                                                    | ND           |
| Nitrofurantoin (100 µg)   | ND                                               | ND           | 13                         | 13           | ND                      | ND           | 11                                                    | 11           |
